# Supplementary material for: An epitope-based malaria vaccine targeting the junctional region of circumsporozoite protein
Source: PubMed Central journal article supplement (PMC7820318; doi:10.1038/s41541-020-00274-4), 2021-01-21
Supplement: 41541_2020_274_MOESM1_ESM.pdf [file 41541_2020_274_MOESM1_ESM.pdf]

## Supporting information:

80-NEDNEKLRKP KHKKLKQPAD GNPDPNANPN VDPNANPNVD PNANPNVDPN ANPNANPNAN PNANPNANP-148

5D5: EDNEKLRKP KHKKLK

MGG4 (15mer): KQPAD GNPDPNANPN

MGG4 (19mer): KQPAD GNPDPNANPN VDPN

CIS43: NPDPNANPN VDPNAN

MAL: NANPNVDPN ANPNANPNAN P

Central Repeat Peptide: N ANPNANPNAN PNANPNA

**Supplementary Figure 1. Sequence of the CSP junctional region and the peptides used in this study.** Colors indicate the N-terminal region (blue), R1 cleavage site (red), and repeat region (black). All peptides were also synthesized to contain a C-terminal -GGGC sequence to facilitate crosslinking.

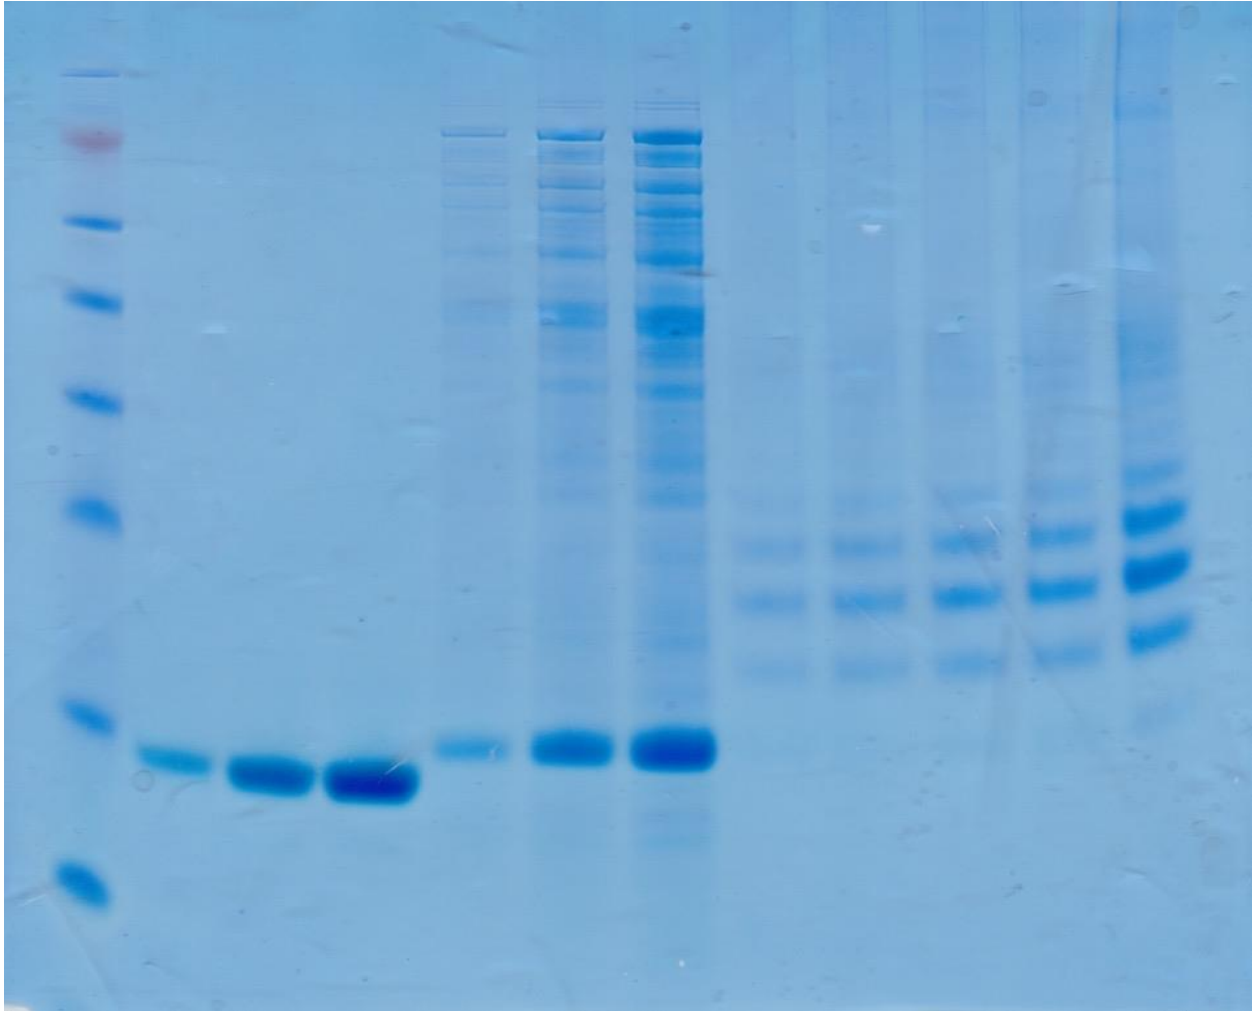

**Supplementary Figure 2. Unmodified gel used as a source of the data shown in Figure 1b**

Lane 1 (left) contains molecular weight markers (Invitrogen SeeBlue Plus2 Prestained Markers).

Lanes 2-4 contain different amounts of Hen Egg Lysozyme (Gold Biotechnology). Lanes 5-7

contain different amounts of unconjugated Q $\beta$  VLPs. Lanes 8-12 contain different amounts of

CIS43 peptide conjugated VLPs. Portions of lanes 1, 6, and 11 are shown in Figure 1b.

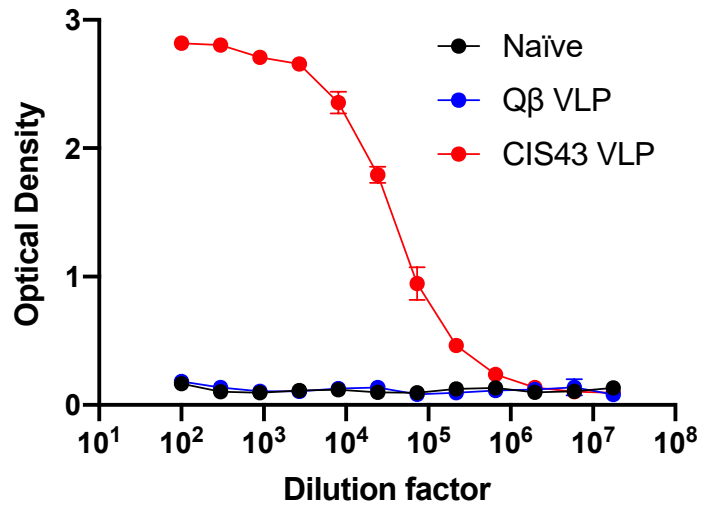

**Supplementary Figure 3. CIS43 VLPs induce anti-CSP IgG antibodies in C57BL6 mice.**

Sera was collected from mice (n=7/group) immunized three times with CIS43 VLPs (red symbols), Qβ VLPs (blue symbols), or from naïve mice (black symbols). Sera was pooled and tested (in duplicate) for reactivity against full-length CSP by ELISA. Error bars represent SD.

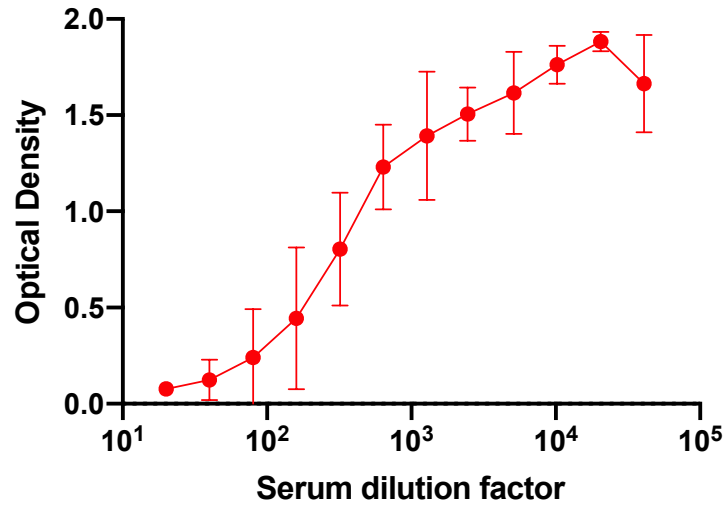

**Supplementary Figure 4. CIS43 VLP mouse sera block the binding of CIS43 mAb to CSP.**

Sera collected from mice immunized with CIS43 VLP adjuvanted with Advax-3 (n=5) were tested for inhibition of CIS43 mAb binding to CSP. Error bars represent SD.

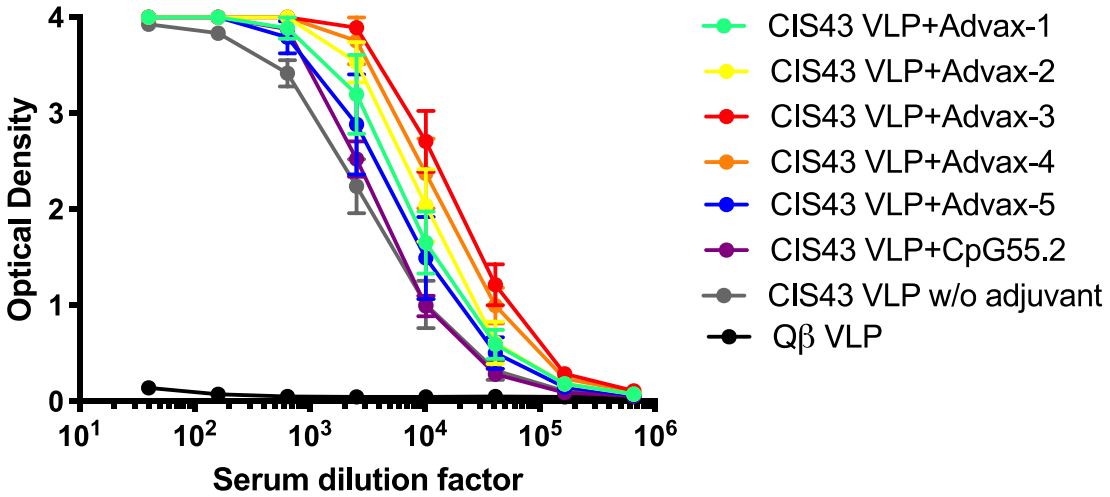

**Supplementary Figure 5. Advax adjuvants enhance anti-CSP IgG response to CIS43 VLP immunization.**

Groups of Balb/c mice (n = 5) were immunized with two doses of CIS43 VLPs adjuvanted with different Advax adjuvant formulations or CpG oligonucleotides. Unadjuvanted CIS43 VLPs and WT Q $\beta$  VLPs were used as controls. Serum was collected three weeks following the second immunization. Error bars represent SEM.

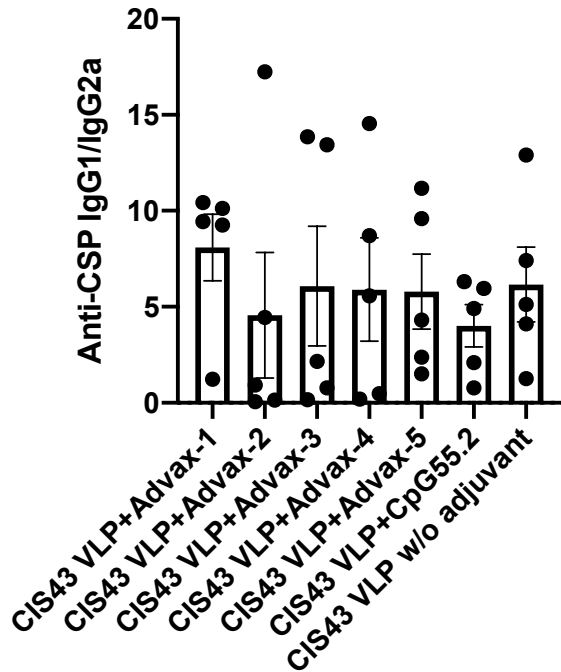

**Supplementary Figure 6. Ratio of detected IgG1 to IgG2A in serum of Balb/c mice immunized with adjuvanted CIS43 VLPs.**

No statistical differences were detected in anti-CSP IgG isotypes in mice immunized with CIS43 VLPs adjuvanted with Advax-1, Advax-2, Advax-3, Advax-4, Advax-5, or CpG55.2 compared to those immunized with unadjuvanted CIS43 VLPs (n=5/group). Dots represent the IgG1/IgG2a ratio of individual mice. Error bars represent SEM.

| <b>Vaccine formulation</b> | <b>Sex</b> | <b>Age (years)</b> | <b>Weight (kg)</b> |
|----------------------------|------------|--------------------|--------------------|
| CIS43 VLPs w/o adjuvant    | M          | 16.9               | 13.3               |
|                            | F          | 13.6               | 8                  |
|                            | F          | 15.8               | 4.2                |
| Q $\beta$ VLPs             | M          | 13.5               | 3.35               |
|                            | F          | 14.5               | 5.2                |
|                            | F          | 16.9               | 5.8                |
| CIS43 VLPs+Advax-3         | F          | 9.9                | 6.9                |
|                            | F          | 17                 | 4                  |
|                            | F          | 13.5               | 5                  |

**Supplementary Table 1. Demographic information of cynomolgus monkeys in the three vaccine groups.**
